# Supplementary material
Source: PubMed Central journal article supplement (PMC4245159)
Supplement: cb5006118_si_001.pdf [file cb5006118_si_001.pdf]

## Supporting Information

### Structural Analysis of Asunaprevir Resistance in HCV NS3/4A Protease

Djadé I. Soumana, Akbar Ali, Celia A. Schiffer\*

*Department of Biochemistry and Molecular Pharmacology,*  
University of Massachusetts Medical School,  
364 Plantation Street, Worcester MA, 01605

\* Corresponding author: [celia.schiffer@umassmed.edu](mailto:celia.schiffer@umassmed.edu)

**Table S1.** Crystallography statistics for HCV NS3/4A protease-inhibitor structures.

| Complexes/crystal                    | WT-ASV                                        | R155K-ASV                                     | WT-ASVmc                                      |
|--------------------------------------|-----------------------------------------------|-----------------------------------------------|-----------------------------------------------|
| PDB ID                               | 4WF8                                          | 4WH6                                          | 4WH8                                          |
| Resolution (Å)                       | 1.6                                           | 1.9                                           | 2.7                                           |
| Space Group                          | P2 <sub>1</sub> 2 <sub>1</sub> 2 <sub>1</sub> | P2 <sub>1</sub> 2 <sub>1</sub> 2 <sub>1</sub> | P2 <sub>1</sub> 2 <sub>1</sub> 2 <sub>1</sub> |
| Molecules in AU <sup>a</sup>         | 1                                             | 1                                             | 2                                             |
| Cell Dimensions                      |                                               |                                               |                                               |
| a                                    | 39.35                                         | 54.92                                         | 58.43                                         |
| b                                    | 60.89                                         | 58.41                                         | 54.96                                         |
| c                                    | 80.87                                         | 60.09                                         | 59.88                                         |
| β (°)                                | 90                                            | 90                                            | 90                                            |
| Completeness (%)                     | 92.7                                          | 91.7                                          | 99.8                                          |
| Measured Reflections                 | 170394                                        | 61851                                         | 26199                                         |
| Unique Reflections                   | 22158                                         | 12673                                         | 6134                                          |
| Average I/σ <sup>c</sup>             | 11.6 (7)                                      | 9.2 (4.3)                                     | 10.5                                          |
| Redundancy                           | 7.7                                           | 4.9                                           | 4.3                                           |
| R <sub>sym</sub> (%) <sup>b, c</sup> | 6.8 (31.5)                                    | 10 (32)                                       | 6.8 (21.2)                                    |
| RMSD <sup>d</sup> in                 |                                               |                                               |                                               |
| Bonds (Å)                            | 0.013                                         | 0.006                                         | 0.015                                         |
| Angles (°)                           | 1.67                                          | 1.5                                           | 1.6                                           |
| R <sub>factor</sub> <sup>e</sup>     | 19.2                                          | 16.8                                          | 17.6                                          |
| R <sub>free</sub> <sup>f</sup>       | 21.8                                          | 21.9                                          | 24.8                                          |

a, AU, asymmetric unit.

b,  $R_{\text{sym}} = \sum |I - \langle I \rangle| / \sum I$ , where I = observed intensity,  $\langle I \rangle$  = average intensity over symmetry equivalent.

c, values in parentheses are for the highest resolution shell.

d, RMSD, root mean square deviation.

e,  $R_{\text{factor}} = \sum ||F_o| - |F_c|| / \sum |F_o|$ .

f,  $R_{\text{free}}$  was calculated from 5% of reflections, chosen randomly, which were omitted from the refinement process.

**Table S2.** Intra and intermolecular hydrogen bond analysis of protease-inhibitor complexes

|                     |  | Complex Structure |                |              |                |                |              |             |               |              |
|---------------------|--|-------------------|----------------|--------------|----------------|----------------|--------------|-------------|---------------|--------------|
|                     |  | WT-ASV            |                |              | R155K-ASV      |                |              | WT-ASVmc    |               |              |
|                     |  | Donnor Atom       | Acceptor Atom  | Distance (Å) | Donnor Atom    | Acceptor Atom  | Distance (Å) | Donnor Atom | Acceptor Atom | Distance (Å) |
| S2 Subsite Residues |  | His57 Hδ          | Asp81 COδ1     | 1.8          | His57 NH       | Asp81 COδ1     | 1.9          | His57 NH    | Asp81 COδ1    | 1.7          |
|                     |  | His57 NH          | Asp81 COδ2     | 1.6          | His57 Hδ1      | Asp81 COδ2     | 1.7          | His57 NHδ1  | Asp81 COδ2    | 1.6          |
|                     |  | Arg155 NH         | Asp168 CO      | 1.9          | Lys155 NH      | Asp168 CO      | 2.0          | Arg155 NH   | Asp168 CO     | 1.9          |
|                     |  | Arg155 NεH        | Asp168 Oδ1     | 1.6          | Arg123 NεH     | Asp168 COδ1    | 1.6          | Arg155 NH12 | Asp168 COδ1   | 2.0          |
|                     |  | Arg123 NεH        | Asp168 Oδ2     | 2.7          | Arg123 NH21    | Asp81 COδ2     | 2.1          | Arg155 NεH  | Asp168 COδ1   | 1.7          |
|                     |  |                   |                |              |                |                |              | Arg123 NH22 | Asp168 COδ2   | 2.9          |
|                     |  |                   |                |              |                |                |              | Arg123 NHε  | Asp168 COδ2   | 1.6          |
| Protease Backbone   |  | Ala157 CO         | HN17           | 1.9          | Ala157 CO      | NHBA           | 1.9          | His57 Nε2   | NH39          | 2.1          |
|                     |  | Ala157 NH         | O15            | 1.9          | Ala157 NH      | OAL            | 2.0          | Ala157 NH   | O34           | 2.1          |
|                     |  | Arg155 CO         | NH06           | 1.9          | Lys155 CO      | NHBB           | 2.0          | Arg155 CO   | H35           | 4.0          |
|                     |  | His57 Nε2         | NH45           | 2.2          | His57 Nε2      | NHBC           | 2.4          | Arg155 CO   | H13           | 2.3          |
|                     |  | Ser138 NH         | O44            | 2.9          | Ser138 NH      | OAK            | 2.6          | Ser138 NH   | O38           | 3.0          |
|                     |  | Gly137 NH         | O44            | 2.0          | Gly137 NH      | OAK            | 2.1          | Gly137 NH   | O38           | 2.3          |
|                     |  | Gly137 NH         | O48            | 2.3          | Gly137 NH      | OAM            | 2.2          | Ala139 NH   | O38           | 2.8          |
|                     |  | Ser139 NH         | O44            | 2.6          | Ser139 NH      | OAK            | 2.5          | Gly137 NH   | O41           | 2.4          |
|                     |  | Ser139 NH         | O47            | 3.1          | Ser139 NH      | OAN            | 2.7          | Gly137 NH   | O42           | 2.5          |
|                     |  | Ser139 Hy         | O47            | 2.1          | Ser139 Hy      | OAN            | 1.8          | Ala139 NH   | O42           | 2.7          |
| Water Molecules     |  | Water Molecule    | Inhibitor Atom | Distance (Å) | Water Molecule | Inhibitor Atom | Distance (Å) |             |               |              |
|                     |  | HW1 HOH 26        | O20            | 2.1          | HW1 HOH 29     | OBF            | 1.9          |             |               |              |
|                     |  | HW1 HOH 122       | O08            | 1.8          | HW1 HOH 142    | NAZ            | 2.0          |             |               |              |
|                     |  | HW2 HOH 135       | O48            | 2.6          | HW1 HOH 145    | O              | 1.9          |             |               |              |
|                     |  |                   |                | HW1 HOH 139  | O              | 1.9            |              |             |               |              |
|                     |  |                   |                | HW2 HOH 139  | OAM            | 2.0            |              |             |               |              |
|                     |  |                   |                | HW2 HOH 60   | OAM            | 2.1            |              |             |               |              |

a) WT-ASV

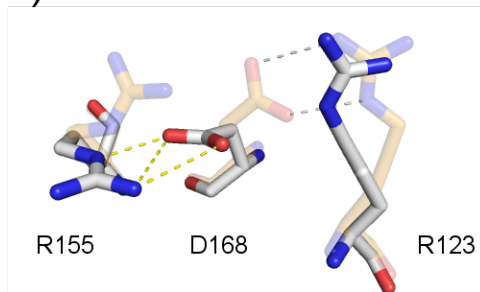

b) R155K-ASV

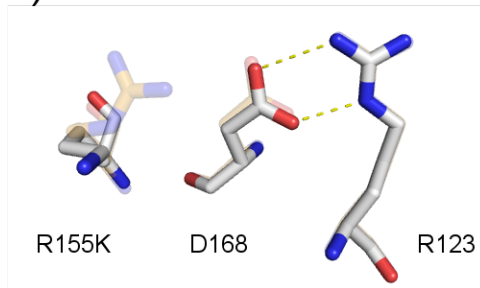

c) WT-ASVmc

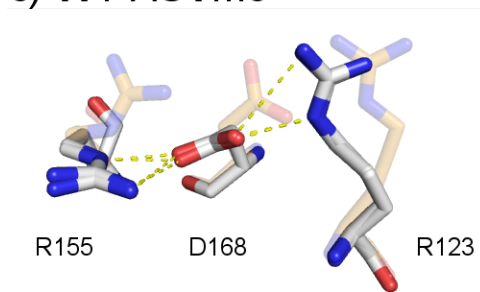

**Figure S1.** Electrostatic network spanning Arg155-Asp168-Arg123 is not conserved in the mutant structure: (a) in the apo NS3/4A (orange transparent sticks, PDB: 3RC6), Asp168 is oriented toward Arg123 for interactions (grey dashed lines). The WT-ASV complex (white sticks) has Asp168's carbonyl oxygens oriented towards Arg155's nitrogens forming a salt-bridge (yellow dashed lines). (b) In the R155K complex (white sticks), Asp168 rotates away from Lys155 and towards Arg123 for interaction, as is observed in the apo structure. (c) In the WT-ASVmc (white sticks), Asp168's position enables an extended salt-bridge formation spanning Arg155-Asp168-Arg123. Both conformers of the crystal structure are represented.

**Figure S2**

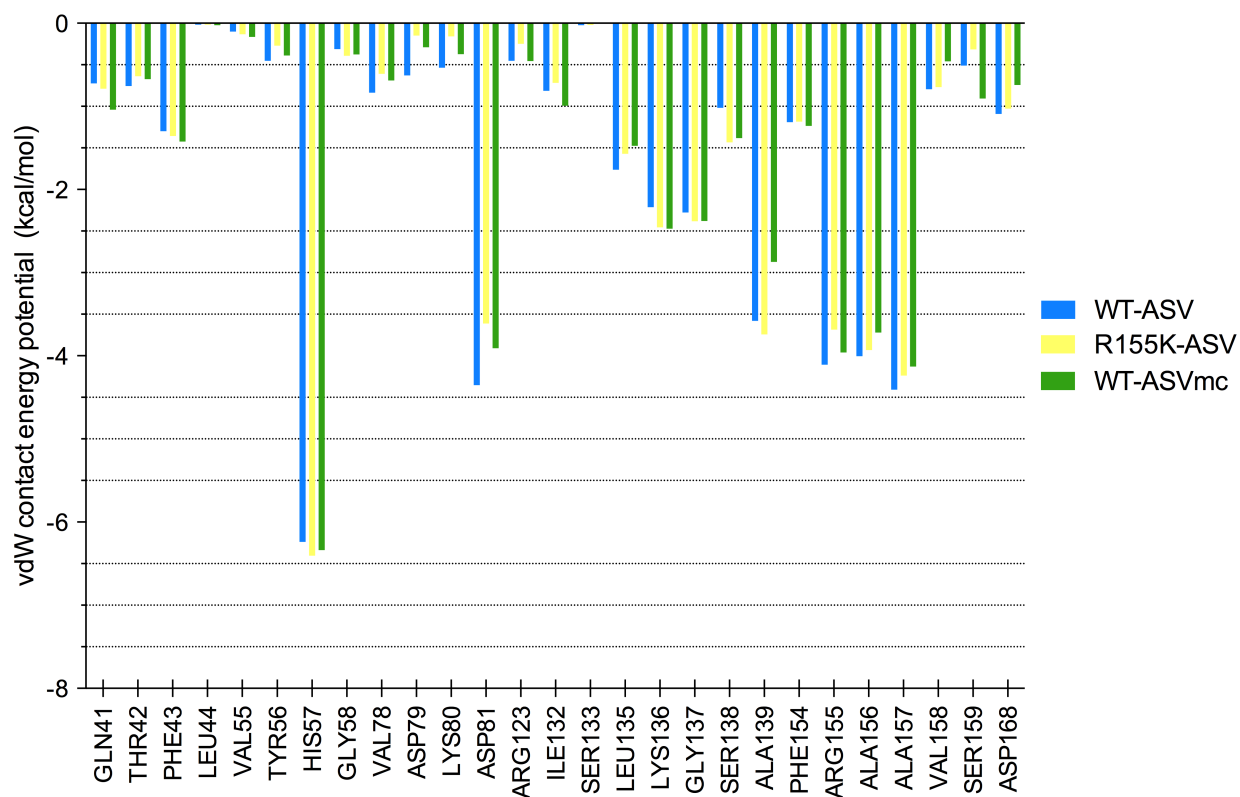

**Figure S2.** The van der Waals contact energy of protease residues in WT-ASV (blue), R155K-ASV (yellow) and WT-ASVmc (green) structures, which are mapped onto the structure in main manuscript Figure 2. ASV's binding mode is characterized by high vdW contact energy with catalytic residues His57, Asp81 as well as S<sub>2</sub> residues Arg155, Ala156 and Ala157.

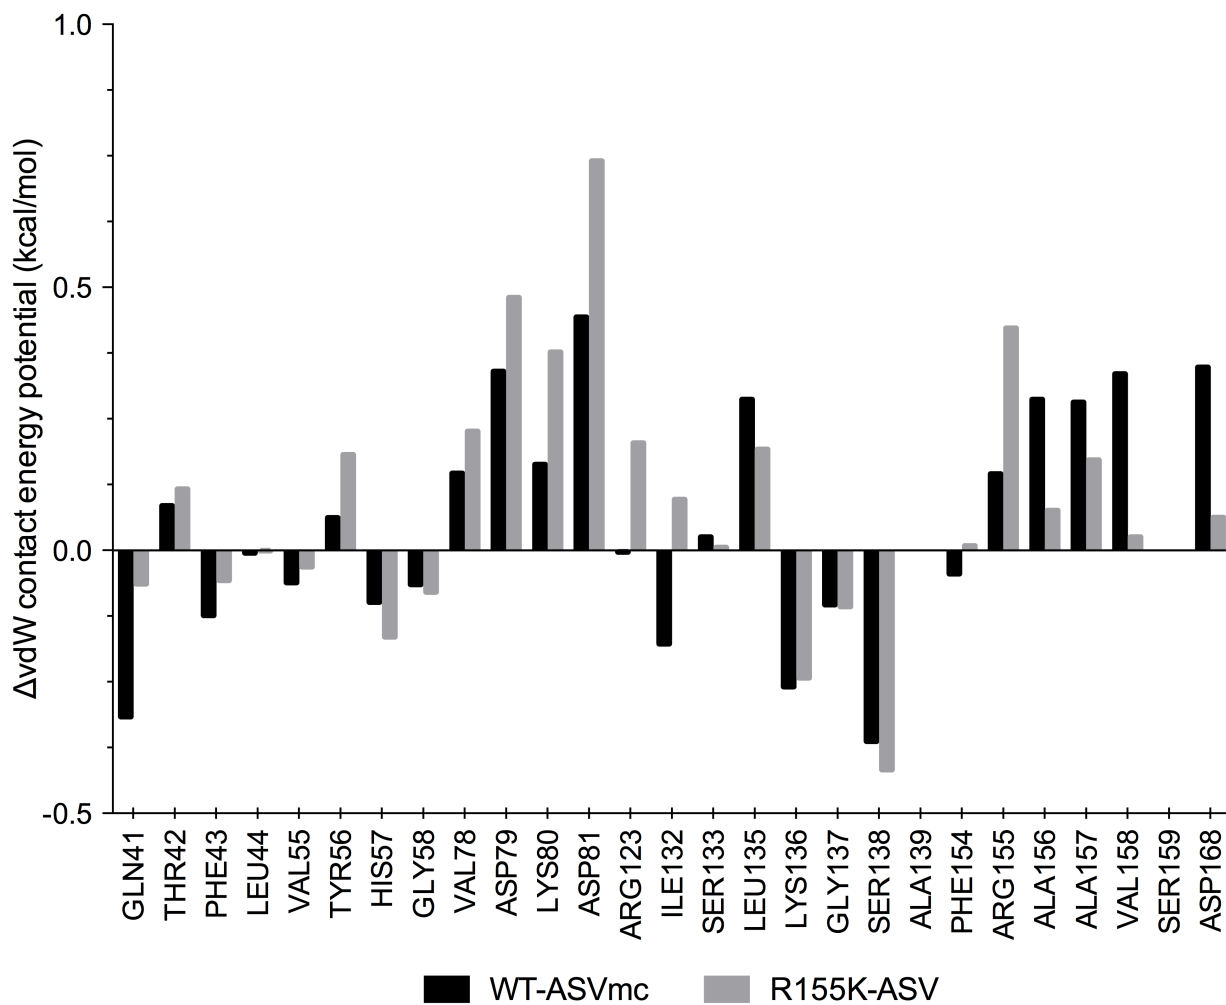

**Figure S3.** Change in van der Waals contact energy of protease residues with the inhibitor in WT-ASVmc (black) and R155K-ASV (grey) relative to the WT-ASV structure.
